# Supplementary material for: Purifying Selection on Splice-Related Motifs, Not Expression Level nor RNA Folding, Explains Nearly All Constraint on Human lincRNAs
Source: PubMed Central journal article supplement (PMC4245815; doi:10.1093/molbev/msu249), 2014-08-25

**Supplementary Figure 2.** ESE motifs evolve slower than non-ESE sites. The substitution rates in ESEs and non-ESEs are shown as a function of the distance from the nearest splice-junction. This figure includes all lincRNAs instead of only the conservative subset (see methods).

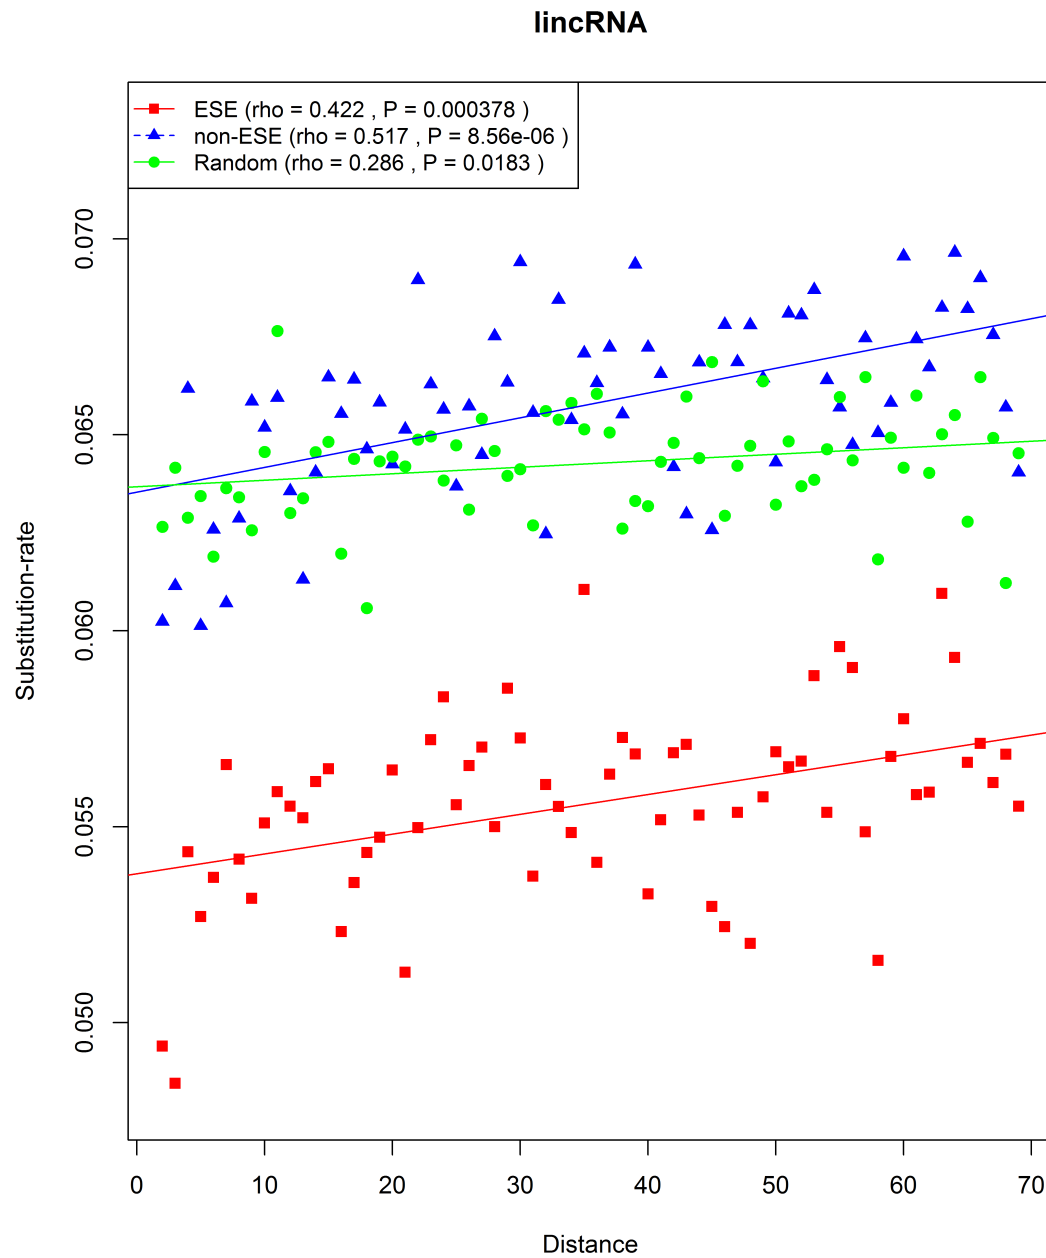

Supplement: supp_msu249_Supplementary_Figure_2.pdf [file supp_msu249_Supplementary_Figure_2.pdf]
