# Supplementary material for: Purifying Selection on Splice-Related Motifs, Not Expression Level nor RNA Folding, Explains Nearly All Constraint on Human lincRNAs
Source: PubMed Central journal article supplement (PMC4245815; doi:10.1093/molbev/msu249), 2014-08-25

**Supplementary Figure 3.** Exon cores and flanks evolve at different rates. The distributions of  $Kec/Kic$  and  $Kef/Kec$  values are shown for protein-coding genes and lincRNAs. This figure includes all lincRNAs instead of only the conservative subset (see methods).

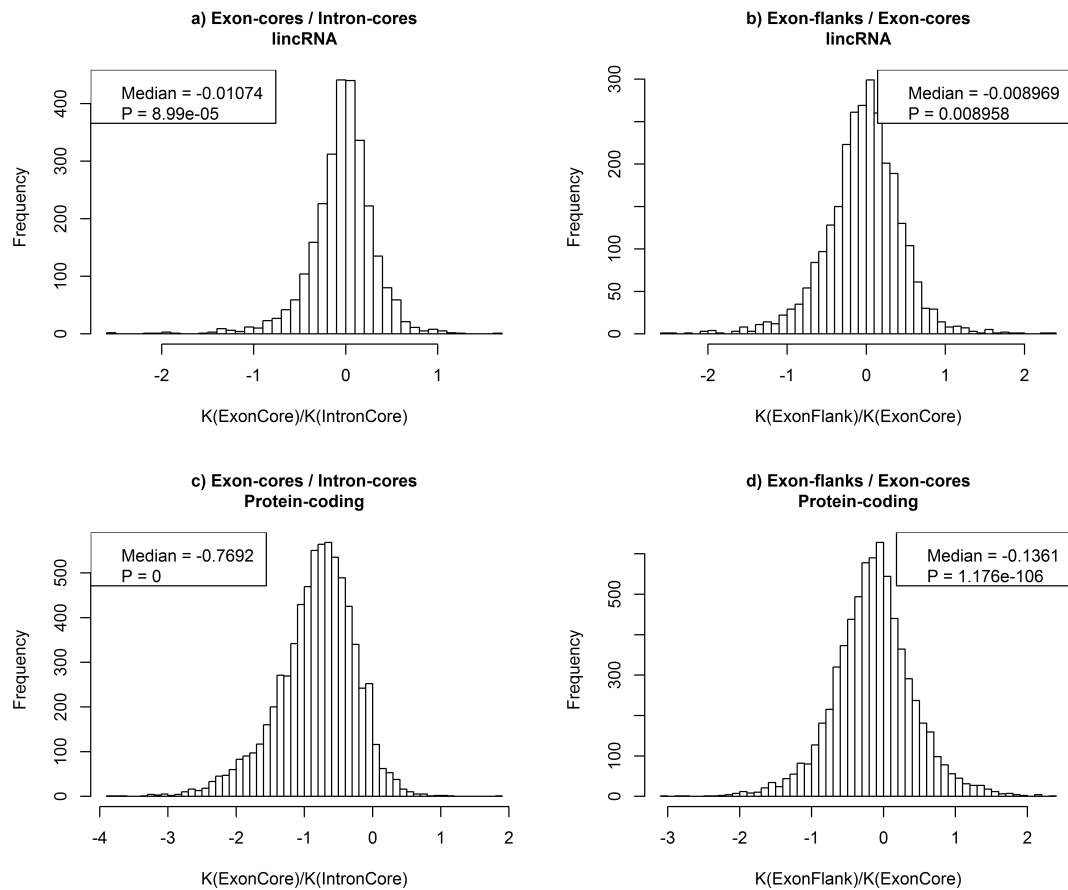

Supplement: supp_msu249_Supplementary_Figure_3.pdf [file supp_msu249_Supplementary_Figure_3.pdf]
