# Supplementary material for: Purifying Selection on Splice-Related Motifs, Not Expression Level nor RNA Folding, Explains Nearly All Constraint on Human lincRNAs
Source: PubMed Central journal article supplement (PMC4245815; doi:10.1093/molbev/msu249), 2014-08-25

H1 - WashU

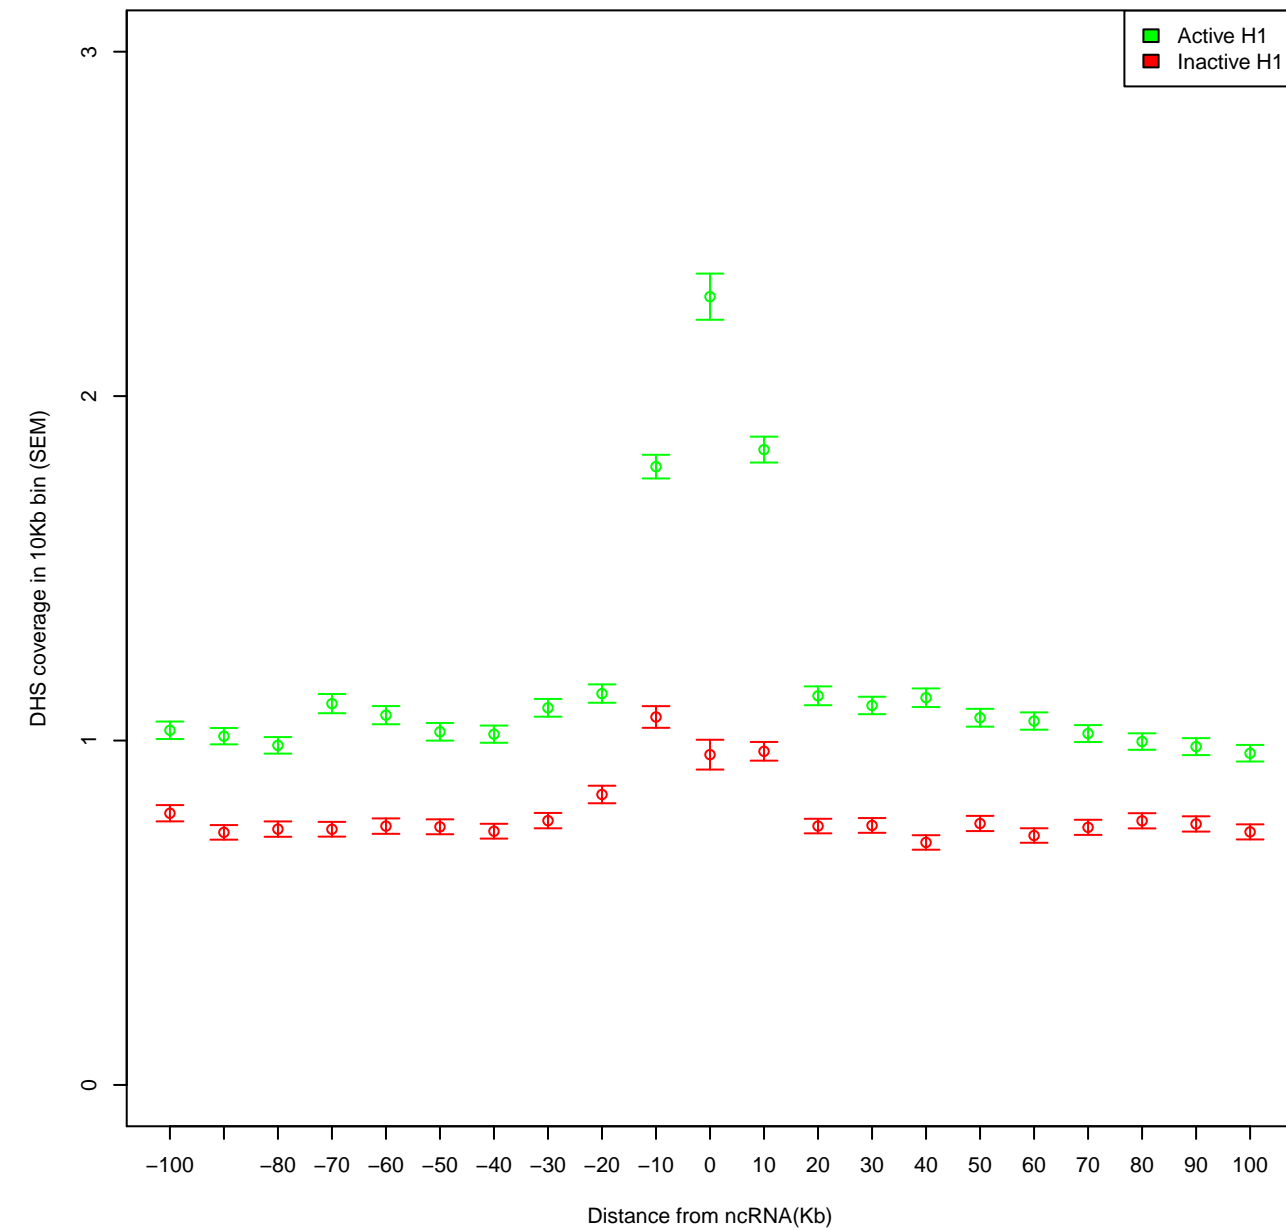

K562 Rep1 - WashU

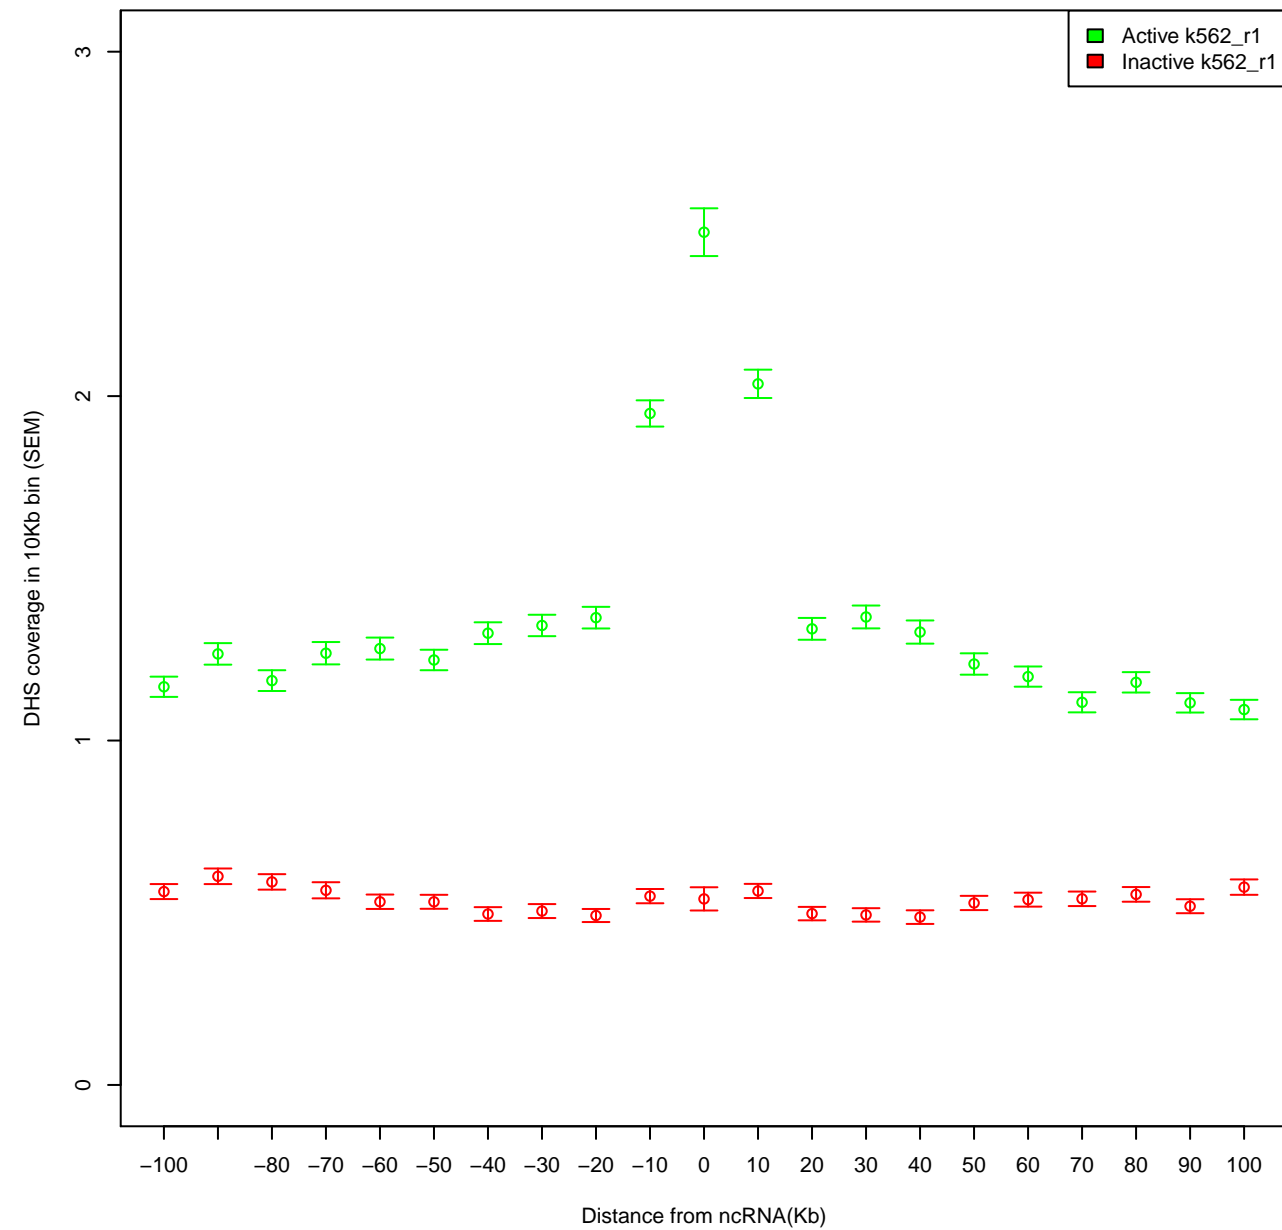

K562 Rep2 - WashU

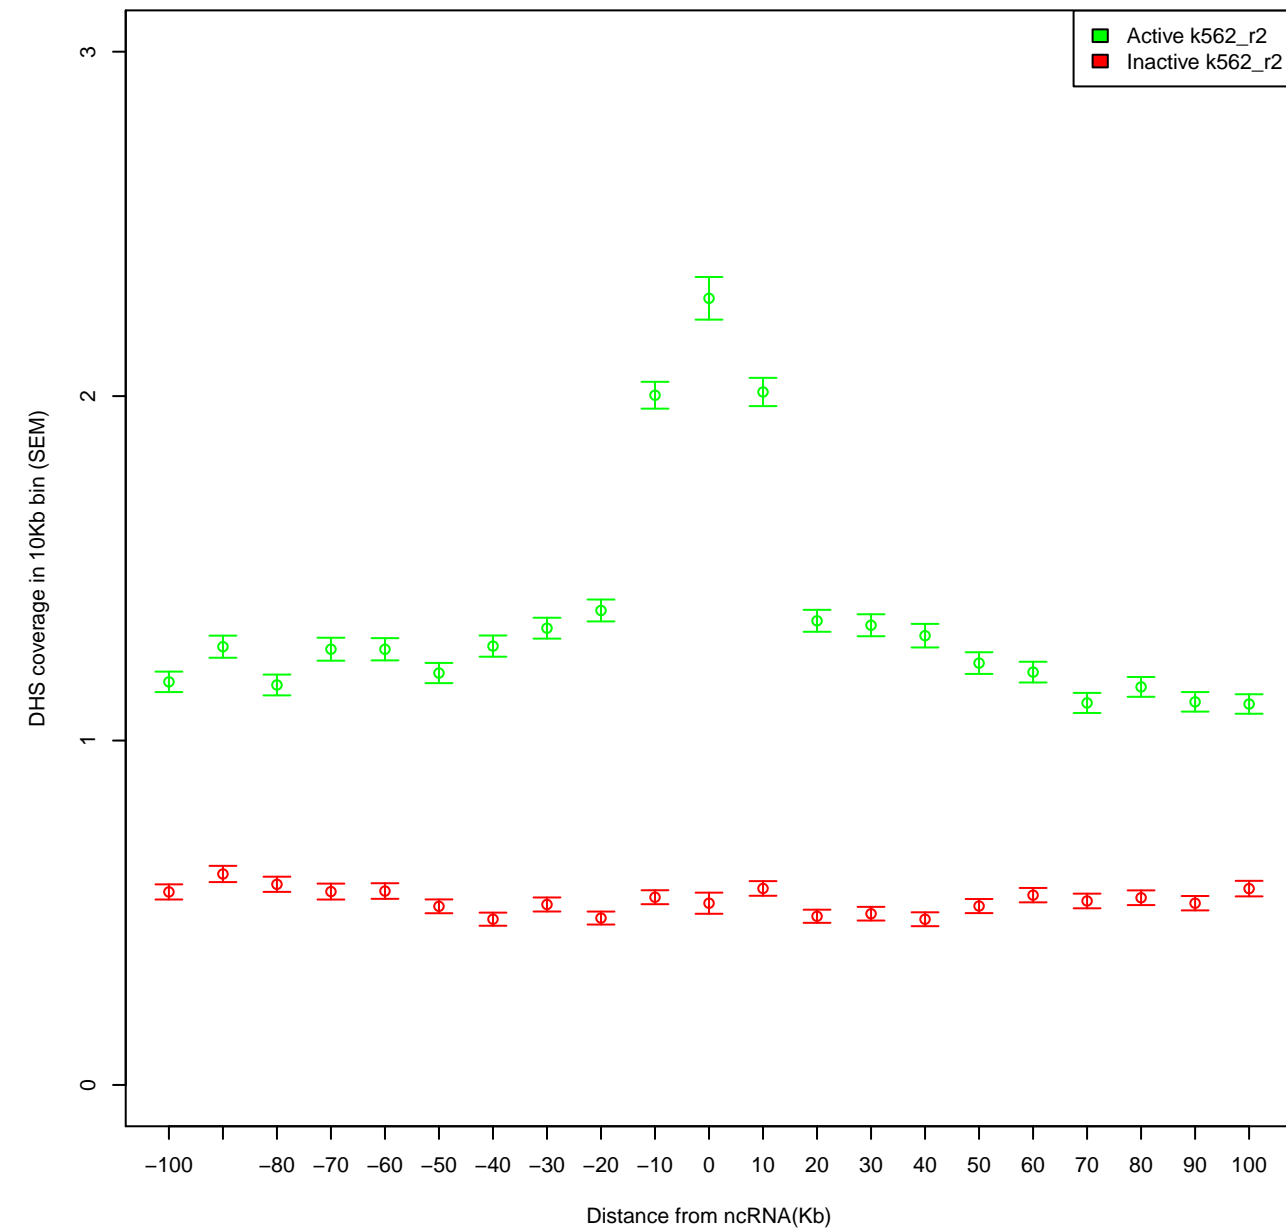

Supplement: supp_msu249_Supplementary_Figure_6.pdf [file supp_msu249_Supplementary_Figure_6.pdf]
