# Supplementary material for: Purifying Selection on Splice-Related Motifs, Not Expression Level nor RNA Folding, Explains Nearly All Constraint on Human lincRNAs
Source: PubMed Central journal article supplement (PMC4245815; doi:10.1093/molbev/msu249), 2014-08-25

**Supplementary Figure 7.** The relationship between local DHS density (+/-50kb either side of a focal gene) and the intron density of that gene.

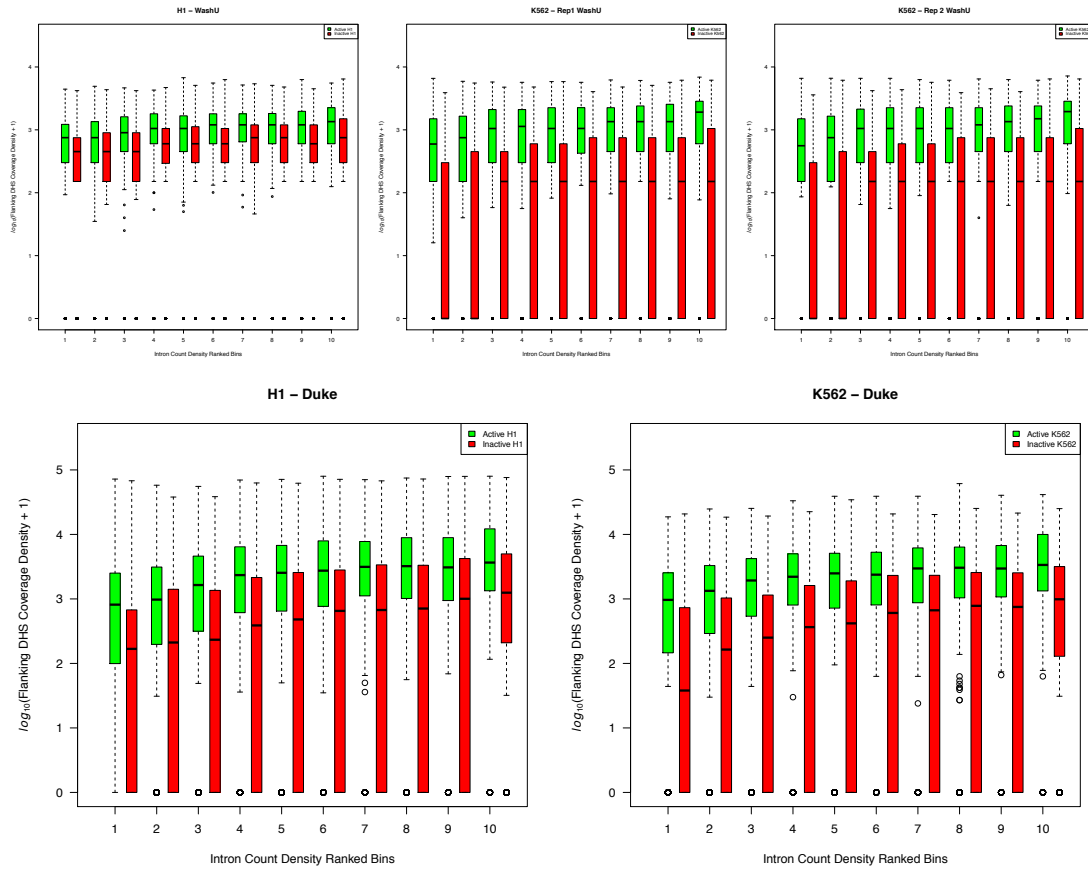

Supplement: supp_msu249_Supplementary_Figure_7.pdf [file supp_msu249_Supplementary_Figure_7.pdf]
