# Supplementary material for: Purifying Selection on Splice-Related Motifs, Not Expression Level nor RNA Folding, Explains Nearly All Constraint on Human lincRNAs
Source: PubMed Central journal article supplement (PMC4245815; doi:10.1093/molbev/msu249), 2014-08-25

**Supplementary Figure 9.** The relationship between the local expression (proportion of genes expressed in +/- 50kb window) and the intron density of the focal gene.

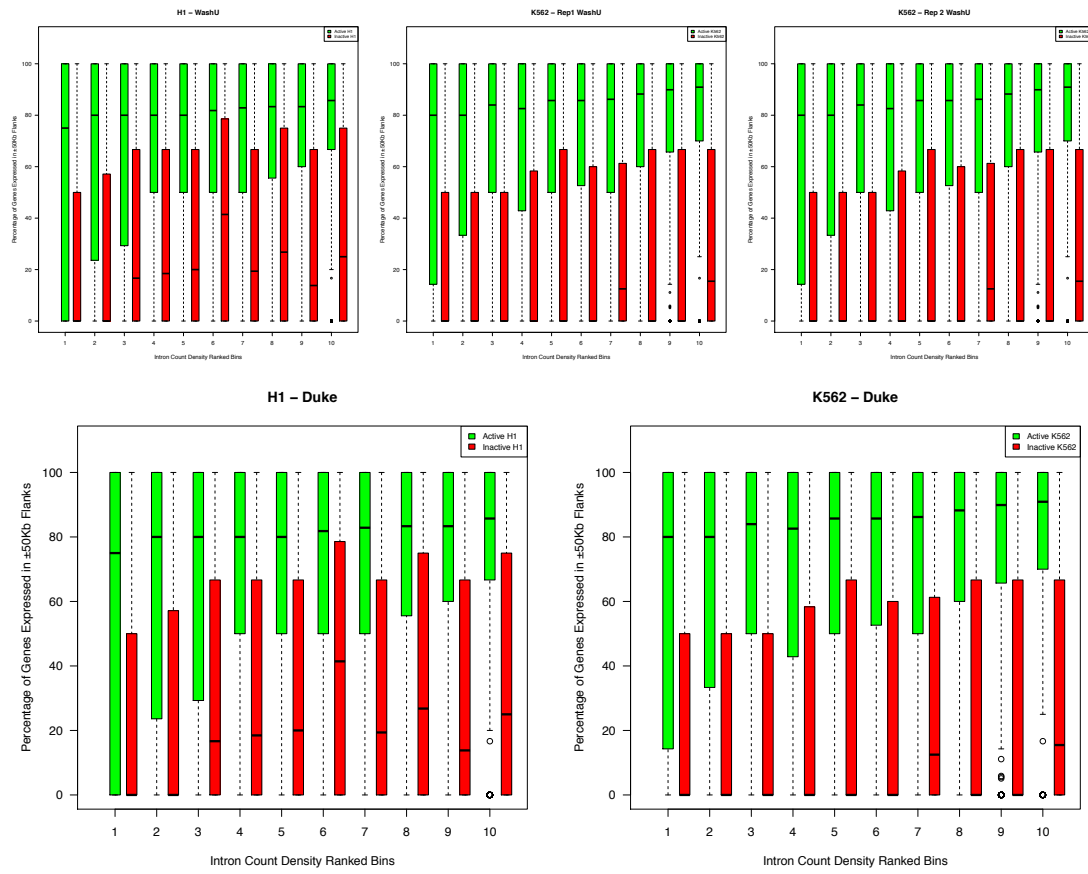

Supplement: supp_msu249_Supplementary_Figure_9.pdf [file supp_msu249_Supplementary_Figure_9.pdf]
