# Supplementary material for: Purifying Selection on Splice-Related Motifs, Not Expression Level nor RNA Folding, Explains Nearly All Constraint on Human lincRNAs
Source: PubMed Central journal article supplement (PMC4245815; doi:10.1093/molbev/msu249), 2014-08-25
Supplement: supp_msu249_Table_S1.pdf [file supp_msu249_Table_S1.pdf]

**Table S1.** Normal and partial correlations with evolutionary rate (measured as Tamura-Kumar distance, see methods) using Pearson product moment correlation and Spearman's. Numbers highlighted in bold are significant after Bonferonni correction with N=14.

| lincRNA              |                             |                             |                             |                             |
|----------------------|-----------------------------|-----------------------------|-----------------------------|-----------------------------|
|                      | Pearson                     |                             | Spearman                    |                             |
|                      | Normal                      | Partial                     | Normal                      | Partial                     |
| Max. Expression rate | -0.025                      | 0.003                       | -0.005                      | 0.032                       |
| Med. Expression rate | -0.028                      | -0.011                      | -0.025                      | -0.035                      |
| Exp. breadth         | -0.046 <sup>#</sup>         | <b>-0.088<sup>**</sup></b>  | -0.038                      | <b>-0.091<sup>**</sup></b>  |
| RNA stability        | 0.012                       | -0.013                      | 0.048 <sup>#</sup>          | 0.009                       |
| Frac70               | -0.034                      | -0.017 <sup>#</sup>         | <b>-0.051<sup>#</sup></b>   | -0.011                      |
| ESE density          | <b>-0.178<sup>***</sup></b> | <b>-0.198<sup>***</sup></b> | <b>-0.182<sup>***</sup></b> | <b>-0.194<sup>***</sup></b> |
| GC                   | -0.043 <sup>#</sup>         | <b>-0.096<sup>**</sup></b>  | <b>-0.058<sup>*</sup></b>   | <b>-0.102<sup>***</sup></b> |
| Protein-coding       |                             |                             |                             |                             |
|                      | Pearson                     |                             | Spearman                    |                             |
|                      | Normal                      | Partial                     | Normal                      | Partial                     |
| Max. expression      | <b>-0.198<sup>***</sup></b> | <b>0.038<sup>*</sup></b>    | <b>-0.203<sup>***</sup></b> | -0.019                      |
| Med. Expression      | <b>-0.302<sup>***</sup></b> | <b>-0.087<sup>***</sup></b> | <b>-0.339<sup>***</sup></b> | <b>-0.063<sup>***</sup></b> |
| Exp. Breadth         | <b>-0.381<sup>***</sup></b> | <b>-0.255<sup>***</sup></b> | <b>-0.369<sup>***</sup></b> | <b>-0.189<sup>***</sup></b> |
| RNA stability        | <b>0.038<sup>*</sup></b>    | <b>-0.04<sup>**</sup></b>   | <b>0.154<sup>***</sup></b>  | <b>0.028<sup>*</sup></b>    |
| Frac70               | <b>-0.201<sup>***</sup></b> | <b>-0.092<sup>***</sup></b> | <b>-0.222<sup>***</sup></b> | <b>-0.101<sup>***</sup></b> |
| ESE density          | <b>-0.22<sup>***</sup></b>  | -0.023 <sup>#</sup>         | <b>-0.29<sup>***</sup></b>  | 0.008                       |
| GC                   | <b>0.219<sup>***</sup></b>  | <b>0.113<sup>***</sup></b>  | <b>0.313<sup>***</sup></b>  | <b>0.168<sup>***</sup></b>  |

Significance codes for p-values: <sup>#</sup>  $P < 0.01$ ; <sup>\*</sup>  $P < 10^{-3}$ ; <sup>\*\*</sup>  $P < 10^{-6}$ ; <sup>\*\*\*</sup>  $P < 10^{-9}$
